# Supplementary material
Source: Springer Nature journal article supplement (https://www.springermedizin.de/resource/supplementary/12939_2013_412_MOESM2_ESM.pdf/9551118)

**Province level**

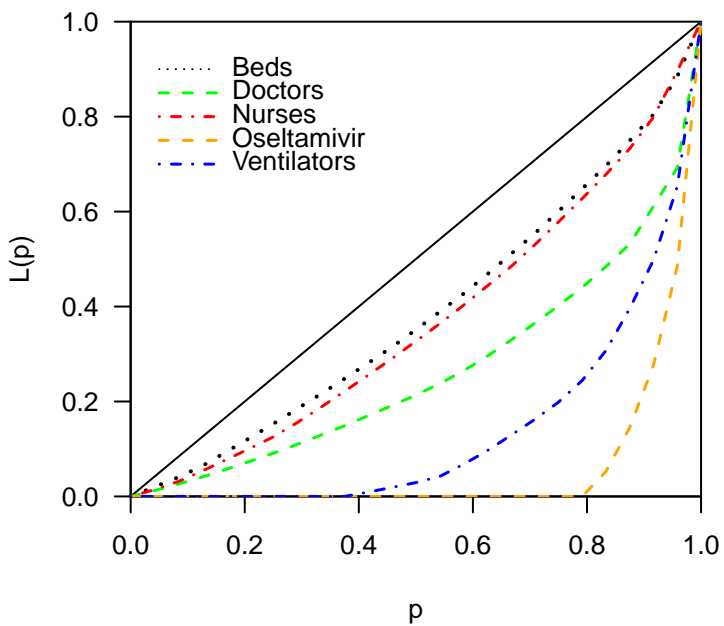

**Province level  
(population weighted)**

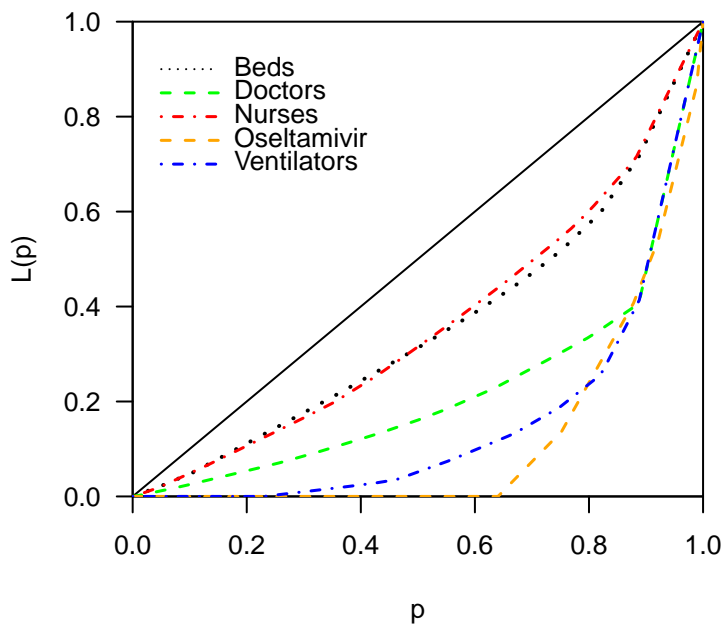

**OD level**

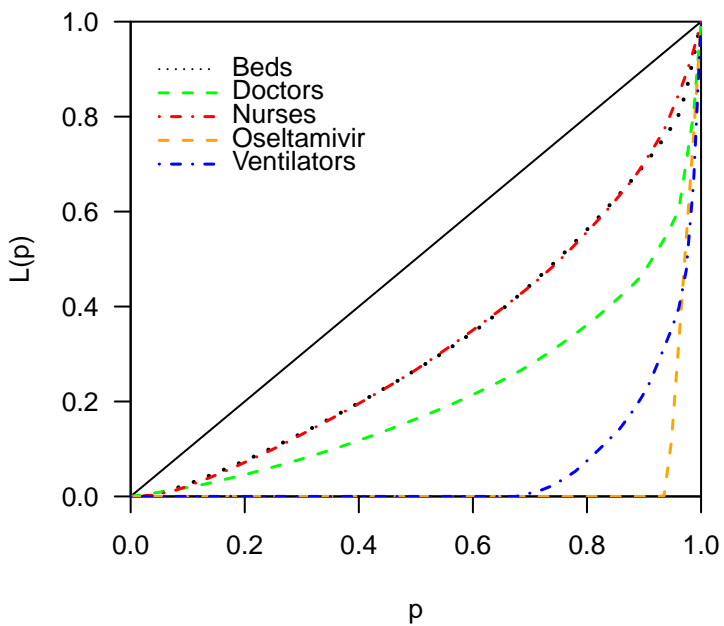

**OD level  
(population weighted)**

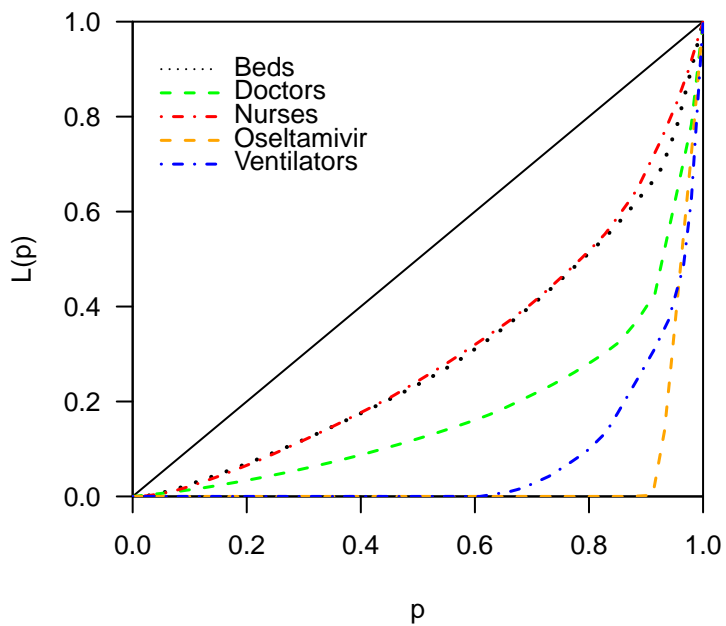

Supplement: MOESM2 [file 9551118]
